# Supplementary material for: Human electrocorticography reveals a common neurocognitive pathway for mentalizing about the self and others
Source: Research Square preprint supplement (doi:10.21203/rs.3.rs-257986/v1), 2021-03-01
Supplement: Supplementary file 1 [file 5638420994f04e9b1eb879a8.pdf]

## Supplementary report

To complement our analyses of onset, peak, and offset latencies (see Fig. 1E and Main Results), we examined single-trial metrics of response duration using analogous methods as the aforementioned latency metrics (see Main Methods). Single-trial analysis (Fig. 1e) was used to identify timepoints within individual trials that featured significant stimulus-evoked responses (brown areas;  $p_{FDR} < .05$ , corrected for number of timepoints, trials, and sites) relative to the pre-stimulus baseline preceding each trial (see Main Methods). The number of timepoints with significant activations and deactivations (i.e., higher or lower HFB power, respectively, relative to the pre-stimulus baseline) was used to calculate single-trial metrics of activation duration and deactivation duration, respectively. Timepoints after behavioral response times ( $RT_{task}$ ) were discarded.

To compare activation durations evoked by self- and other-mentalizing across regions-of-interests (ROIs), we examined single-trial metrics of activation duration from ROI sites using the same inclusion criteria and linear mixed-effect model (LMEM) specifications as ROI analyses of onsets, peaks, and offsets (see Main Methods). These LMEM specifications identified variance unique to Condition (other-self) and  $RT_{task}$  while accounting for heterogeneity across subjects and sites (Supplementary Table 1). Next, we examined whether self/other differences and  $RT_{task}$  associations became stronger or weaker in ROIs with later activations. To this end, we correlated Condition and  $RT_{task}$  effect sizes ( $b$ -coefficients in Supplementary Table 1) with mean onset latencies (black squares in Fig. 3f) across all seven ROIs.

We found that other-mentalizing evoked significantly ( $p < .05$ ) longer activations than self-mentalizing in posteromedial cortex (PMC), anteromedial prefrontal cortex (amPFC), dorsomedial prefrontal cortex (dmPFC), and ventromedial prefrontal cortex (vmPFC; Supplementary Fig. 1). Non-significant self/other differences were found in visual cortex, temporoparietal junction (TPJ), and anterior temporal lobe (ATL). Moreover, we found that

self/other differences became stronger in ROIs with later activations;  $r(5) = .96, p = .0008$  (Supplementary Table 1). LMEMs also revealed that all ROIs significantly predicted  $RT_{\text{task}}$  in the positive direction (Supplementary Table 1). Unexpectedly, we found that  $RT_{\text{task}}$  effects became weaker in ROIs with later activations;  $r(5) = -.81, p = .028$ .

**Supplementary Figure S1.** Mean activation duration across mentalizing type and ROI. Error bars indicate standard error. Asterisks indicate significant ( $p < .05$ ) self/other differences after accounting for behavioral response times and other confounds (see Supplementary Table 1). Abbreviations: Visual = visual cortex; ATL = anterior temporal lobe; TPJ = temporoparietal junction; PMC = posteromedial cortex; amPFC = anteromedial prefrontal cortex; dmPFC = dorsomedial prefrontal cortex; vmPFC = ventromedial prefrontal cortex; ms = millisecond.

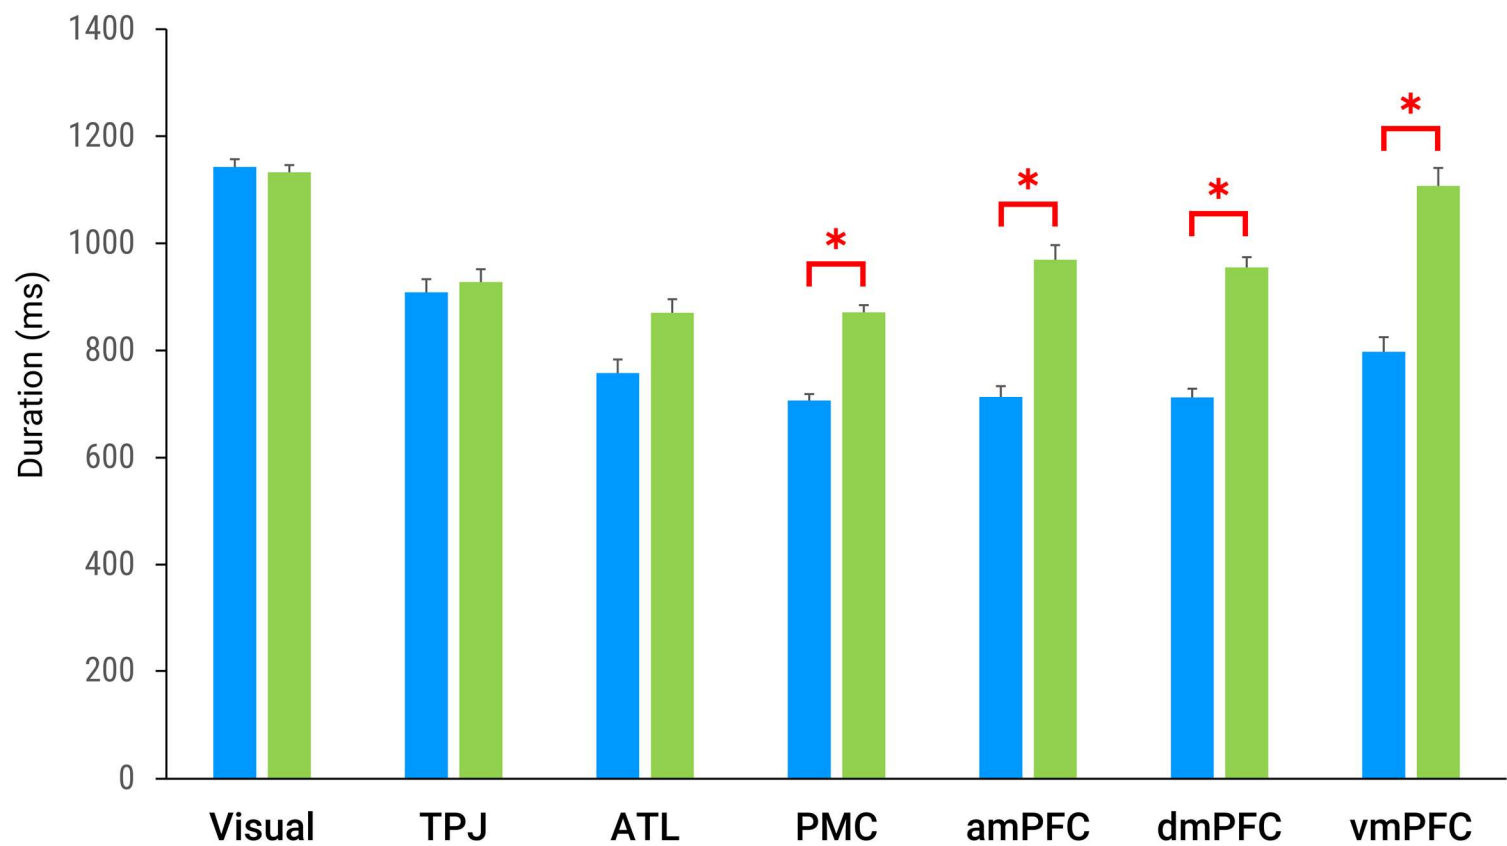

**Supplementary Figure S2.** Single-subject results from exemplar ROI sites in Subject 5, which are indicated by arrows in Panel C. **A)** Heatmaps of HFB power (z-scored) within each timepoint and trial. Black areas indicate timepoints discarded after  $RT_{Task}$ . **B)** Timecourses of mean HFB responses ( $\beta$ ) estimated by LMEMs using the data in Panel A. Thick solid lines indicate significant responses relative to the pre-stimulus baseline ( $p_{FDR} < .05$ ), while thin dotted lines indicate non-significant responses. **C)** Single-site results from Subject 5 overlaid on their native cortical surface. Activation refers to HFB responses significantly higher than baseline, while deactivation refers to responses significantly lower than baseline. Mentalizing-active sites are colored by the t-score of self/other differences in HFB peak power. **Abbreviations:** HFB = high-frequency broadband; LMEM = linear mixed-effects model; s = seconds;  $\beta$  = standardized LMEM coefficient;  $p_{FDR}$  = p-value adjusted for False Discovery Rate; NS = not significant ( $p_{FDR} > .05$ )

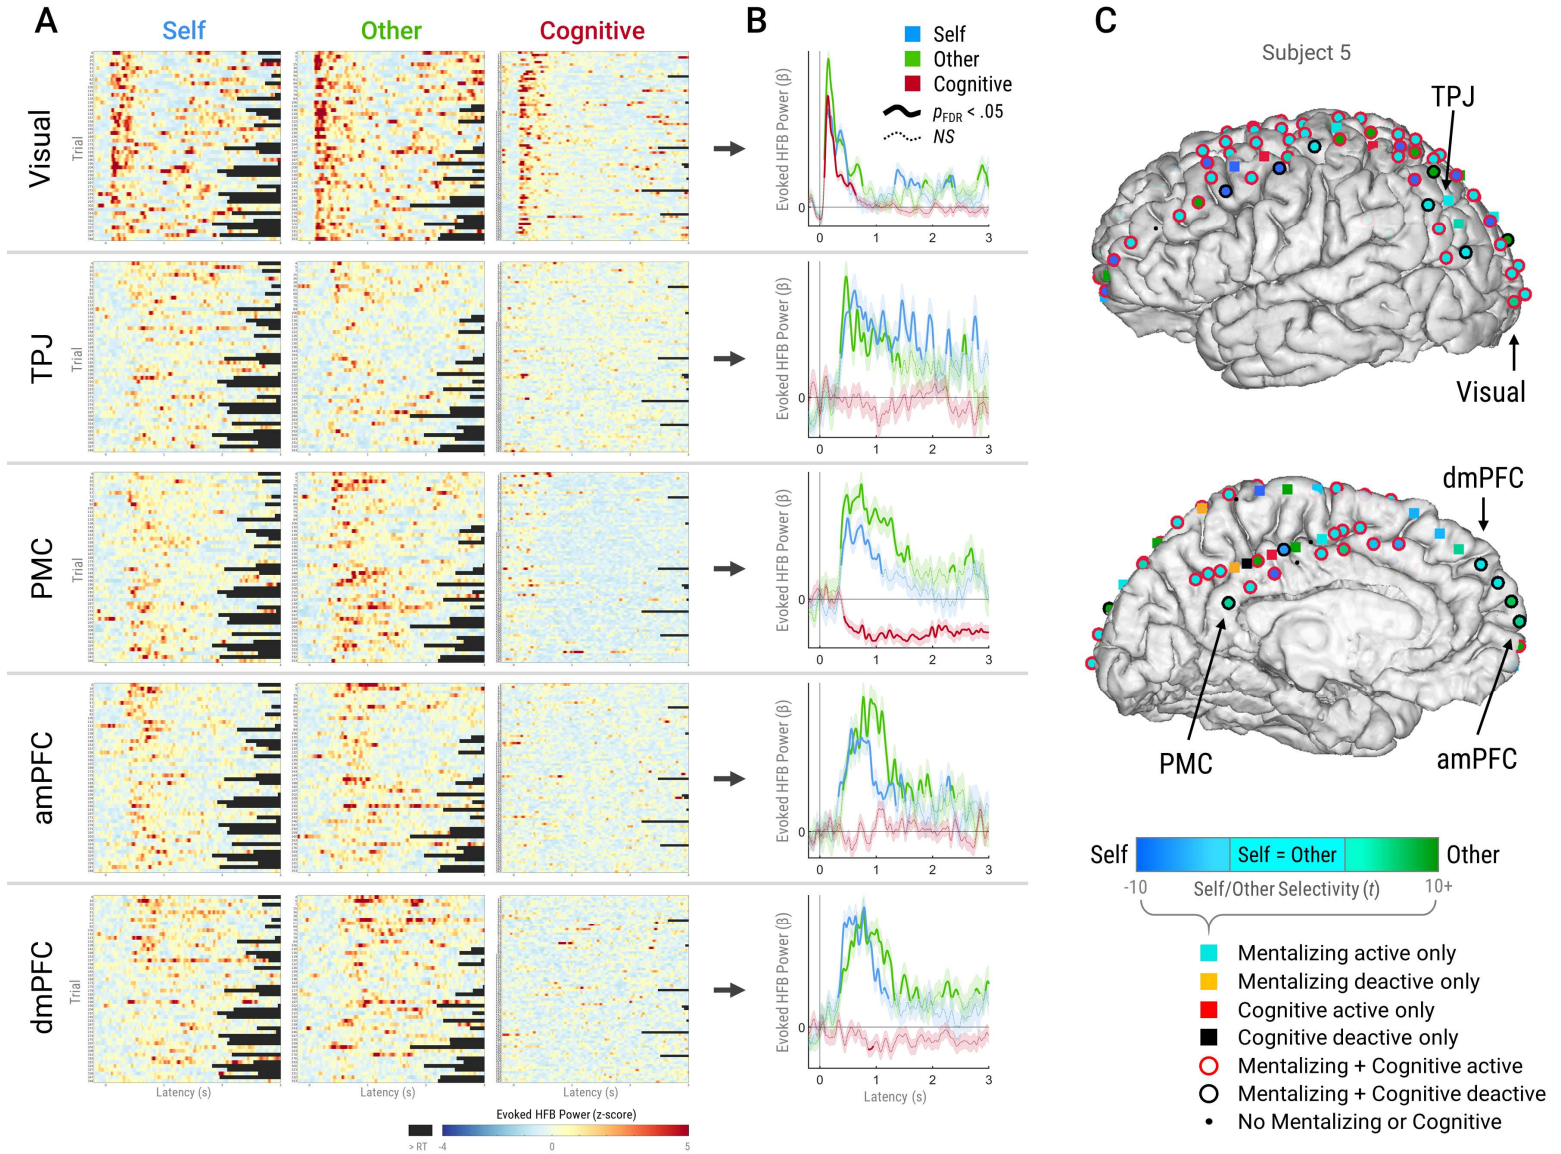

**Supplementary Figure S3.** Mean difference between HFB offsets and behavioral response times ( $RT_{Task}$ ) during mentalizing (collapsed across self and other). Error bars indicate standard error of the mean.

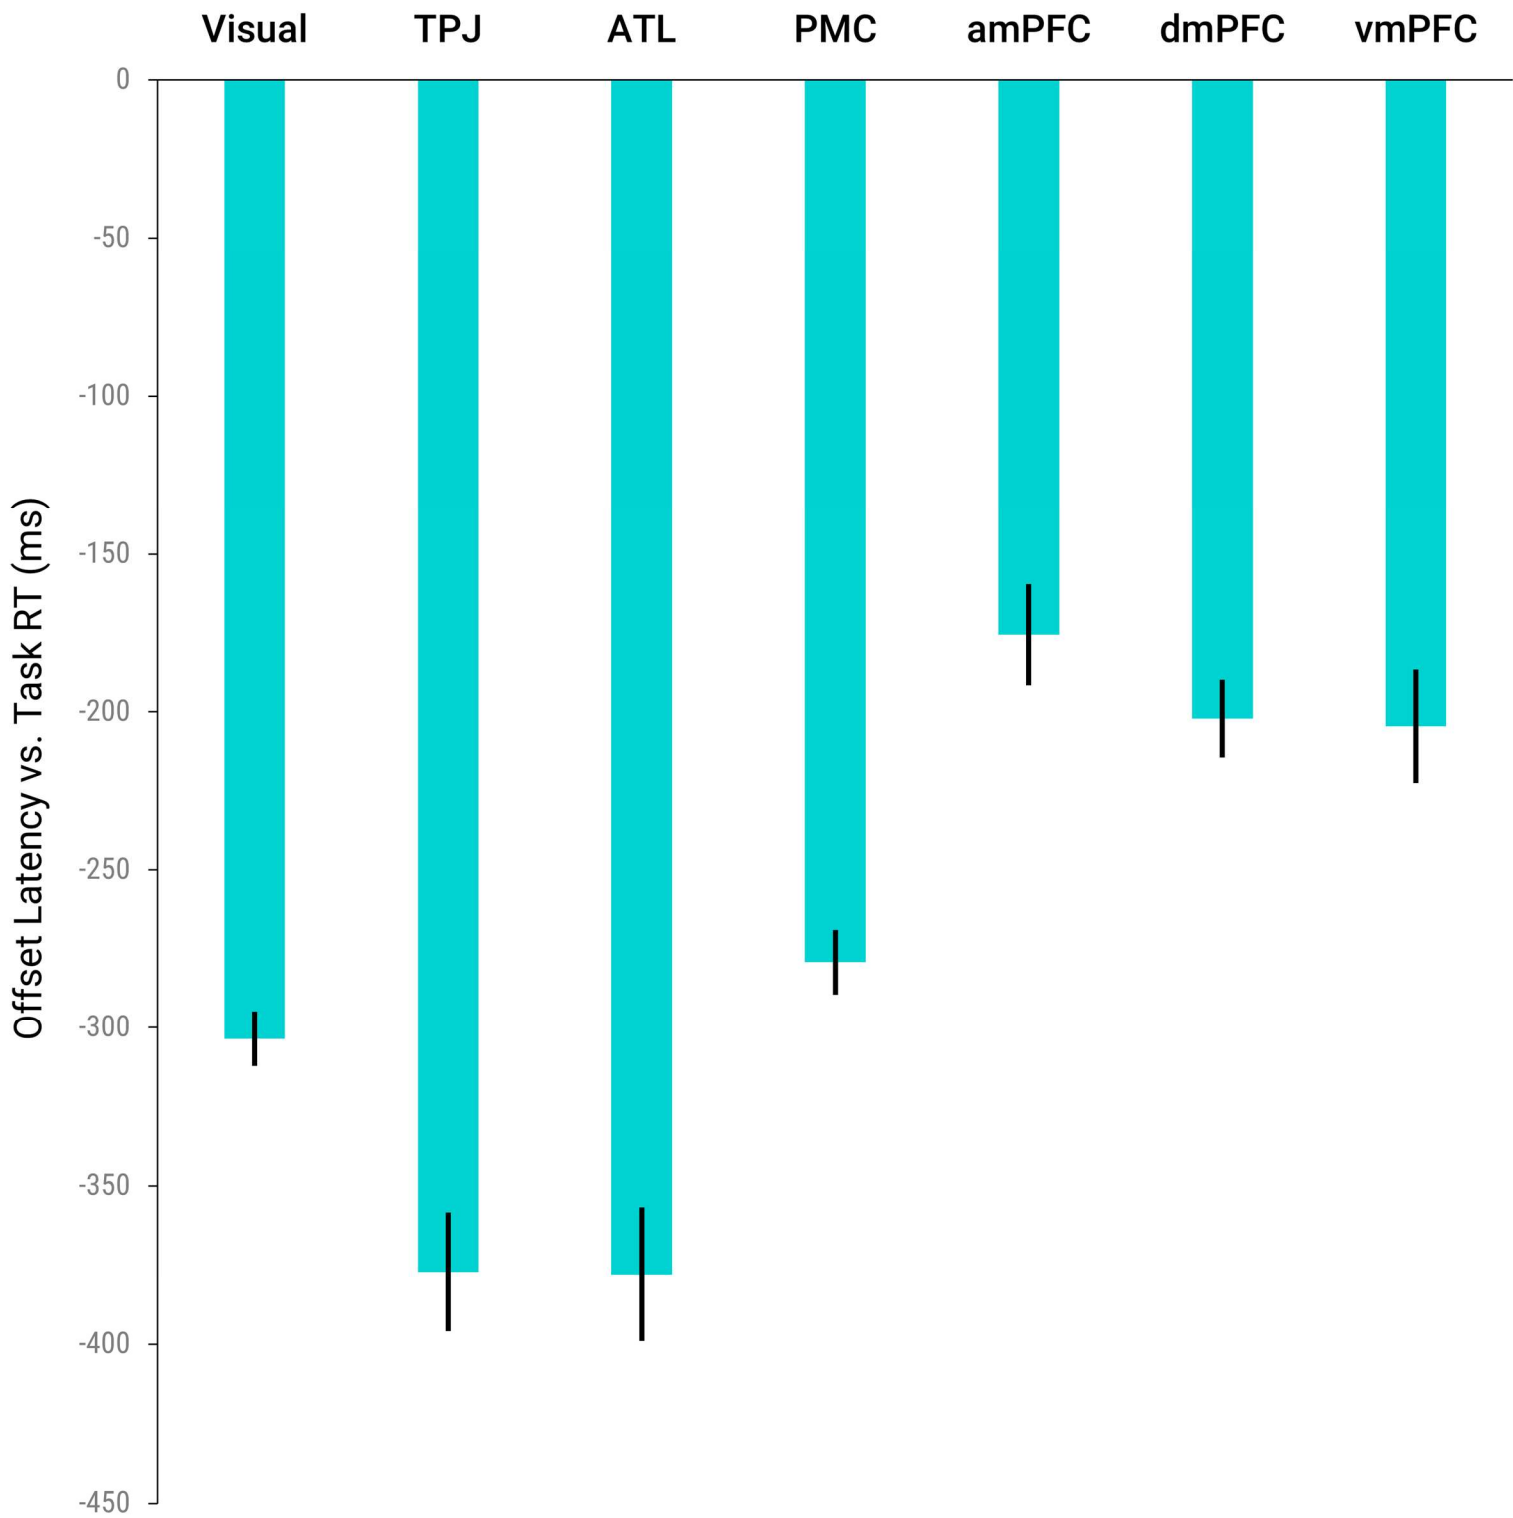

Supplementary Figure S4: expanded lateralized views of Figure 3a. MNI map of sites identified as active, deactive, or nonresponsive for mentalizing via trial-averaged analysis ( $p_{FDR} < .05$ ; corrected for number of timepoints and sites)

L

R

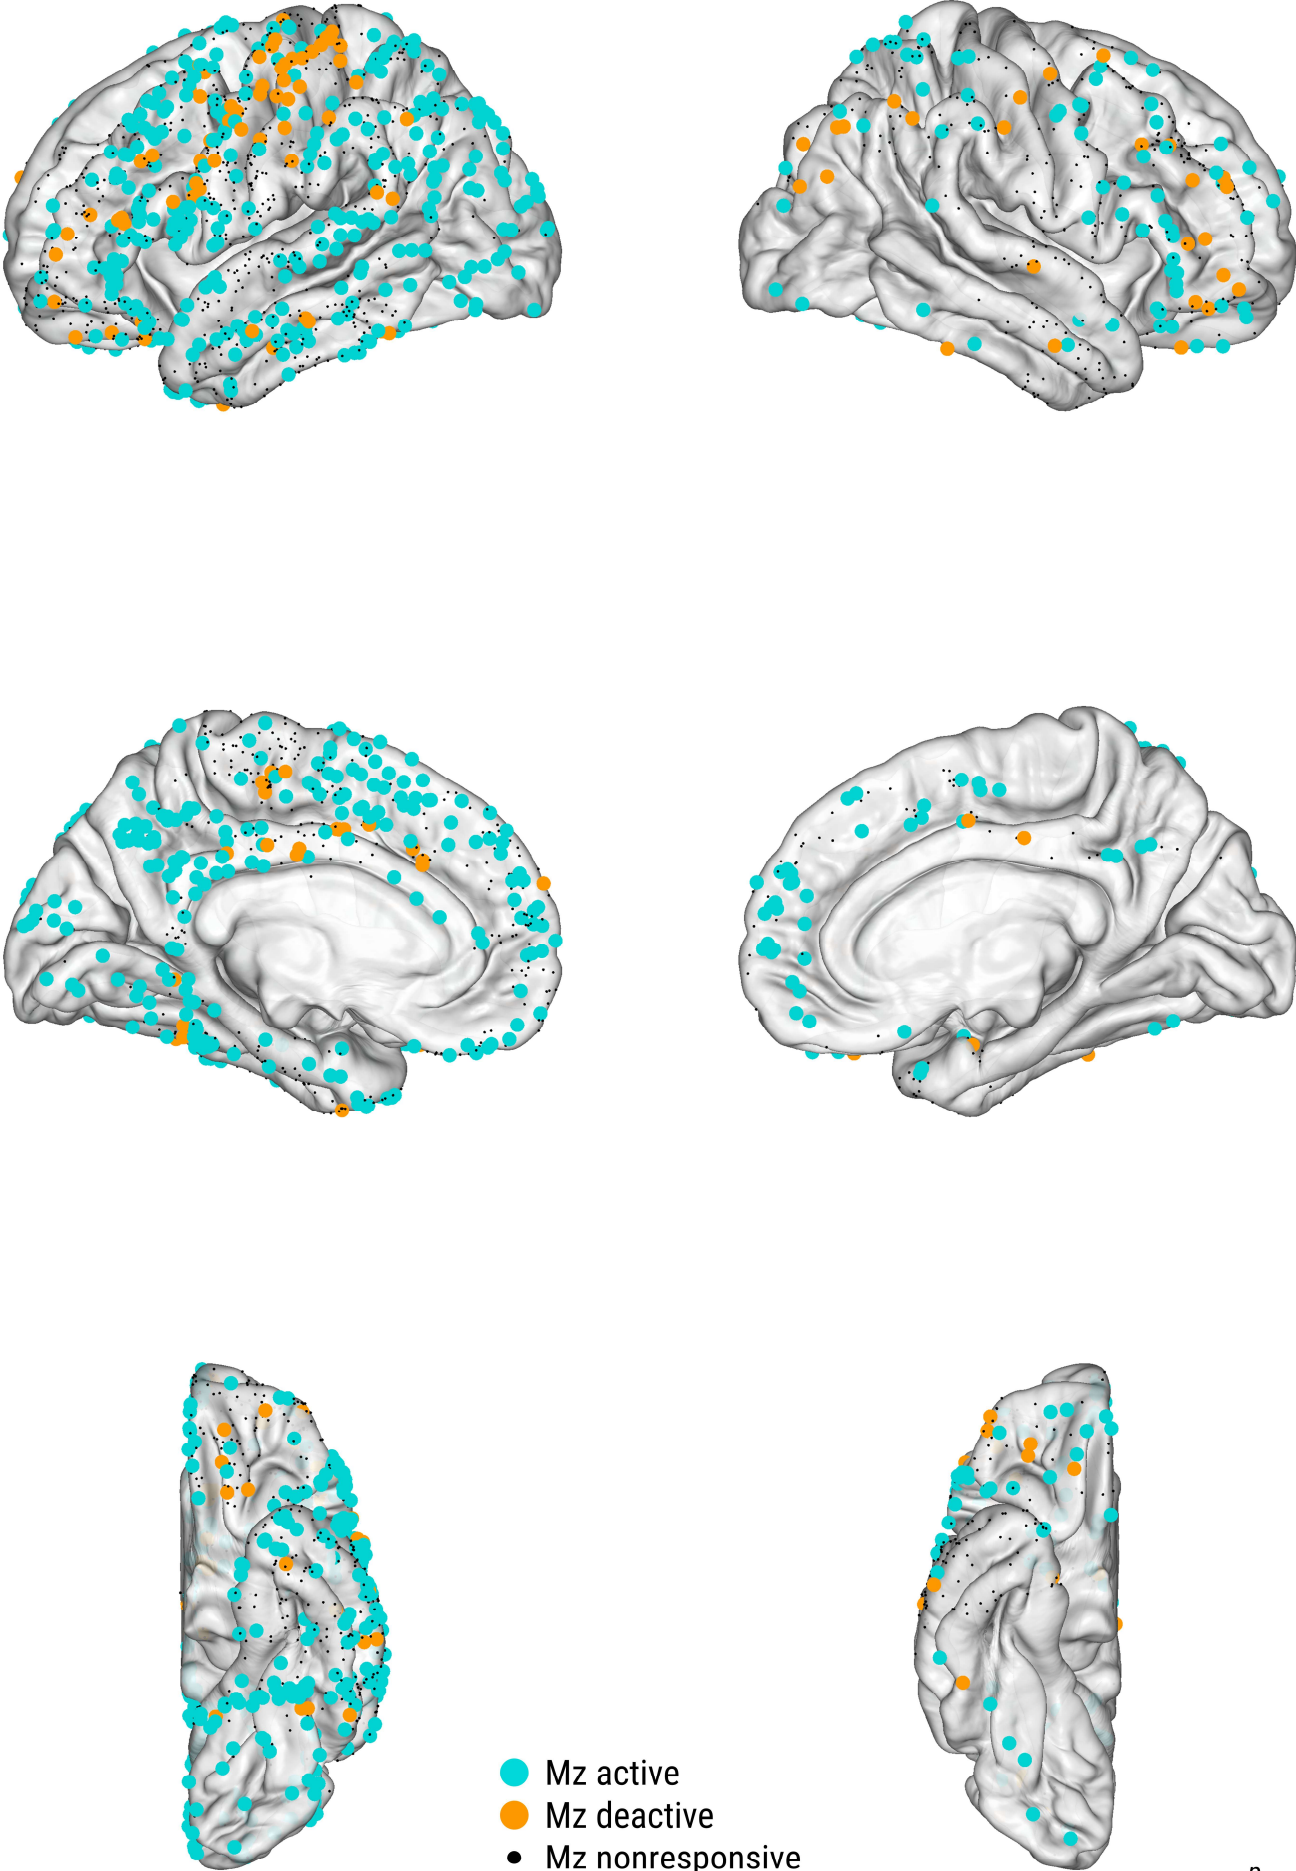

$p_{FDR} < .05$



Supplementary Figure S5: expanded lateralize views of Figure 3C. Functional specificity of mentalizing-active sites as identified by trial-averaged analysis ( $p_{FDR} < .05$ ; corrected for number of timepoints and sites). Sites were considered 'mentalizing-specific' (light and dark turquoise) if they were mentalizing-active but not cognitive-active. Sites we reconsidered 'non-specific' (pink) if they coactivated for mentalizing and the cognitive task.

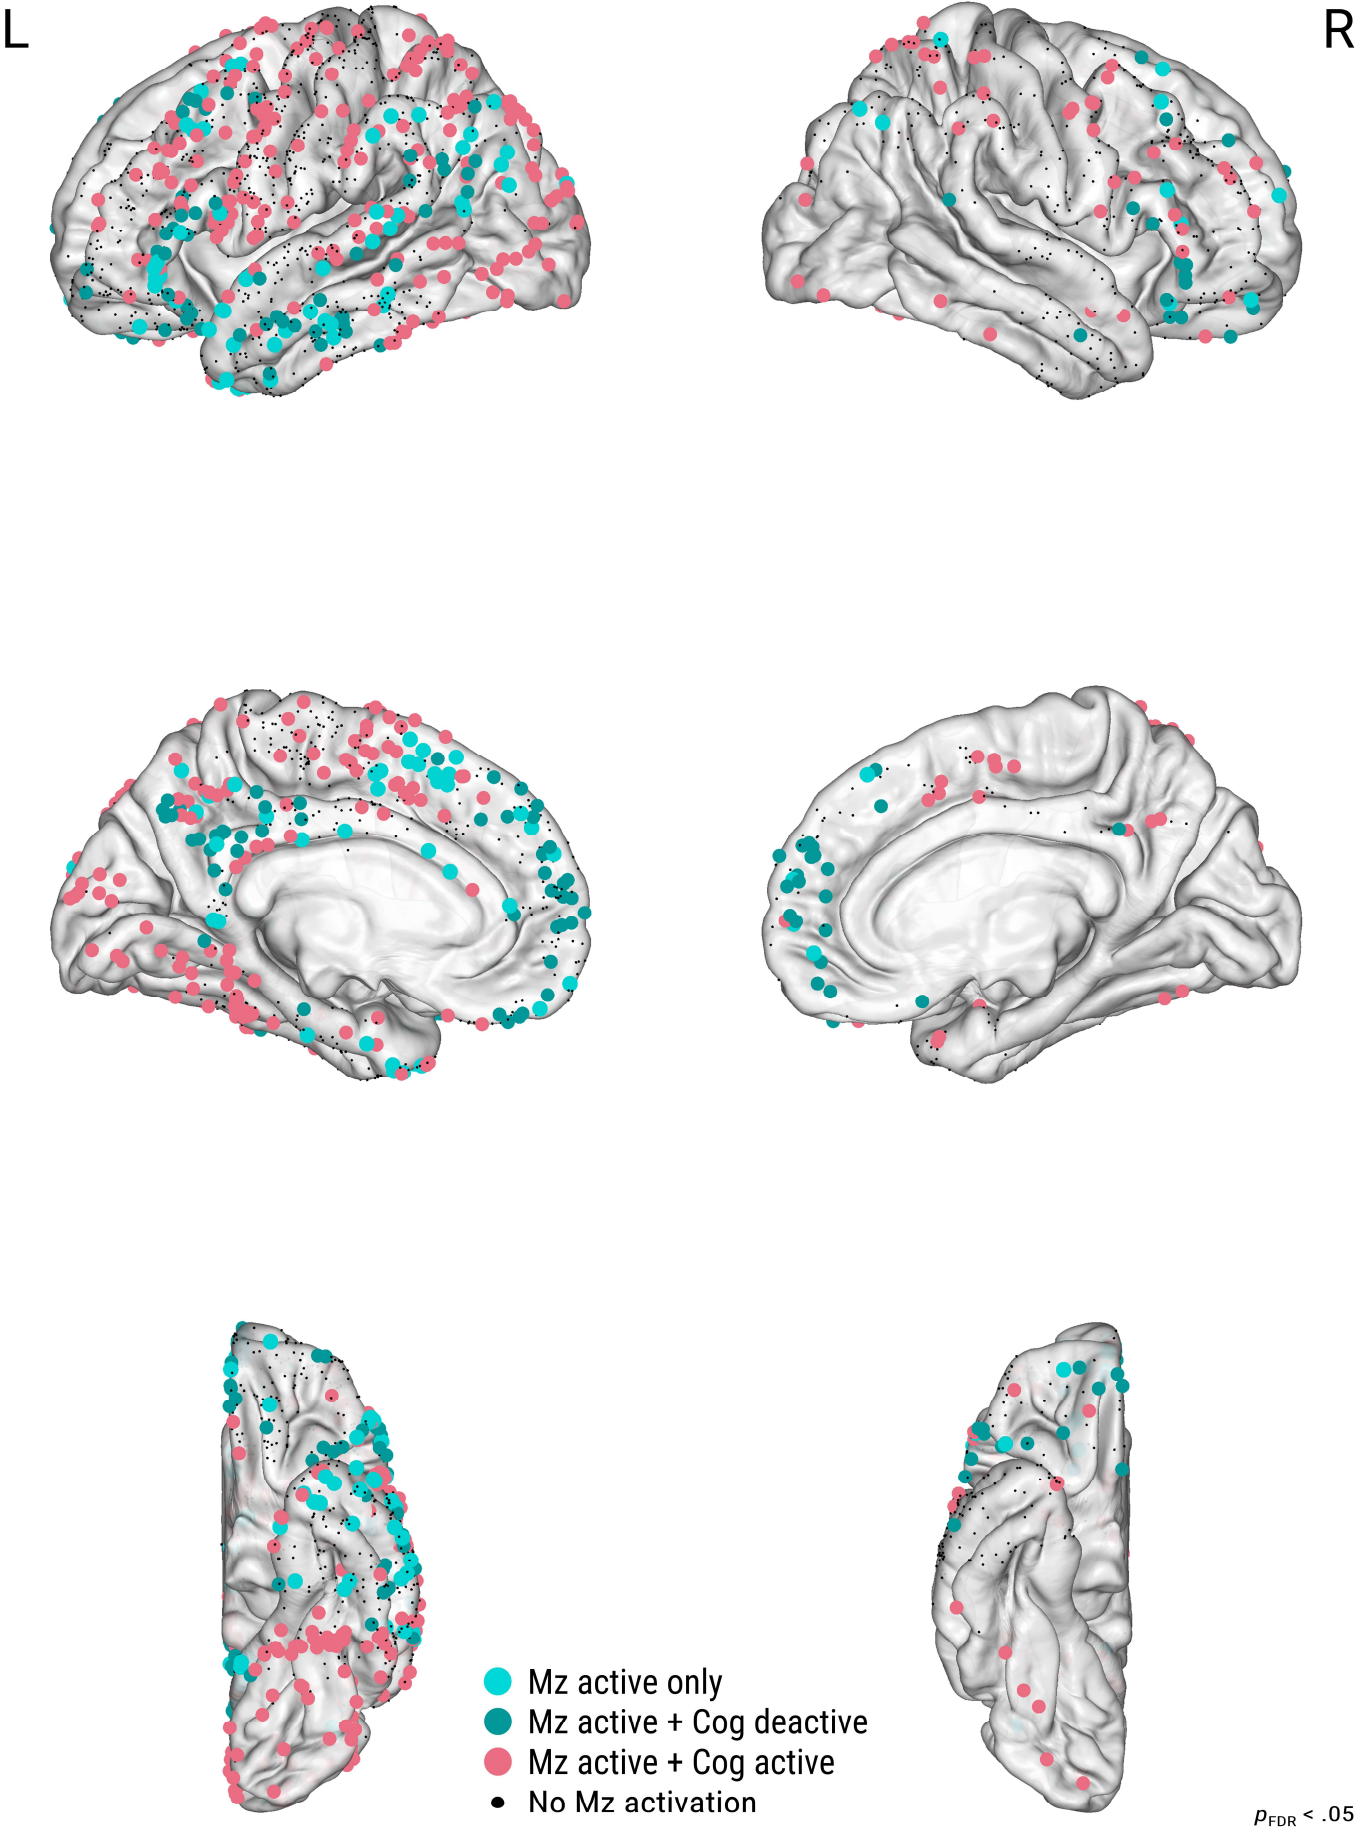

Supplementary Figure S6: expanded lateralized views of Figure 4A. Functional anatomy of self- and other-mentalizing. Circles indicate sites with significant HFB activations for both self- and other-mentalizing, colored by the t-score of self/other differences in HFB peak power ( $p_{FDR} < .05$ ; corrected for number of sites). Squares indicate sites with significant activations for only one mentalizing type. Dots indicate sites with nonsignificant mentalizing activations

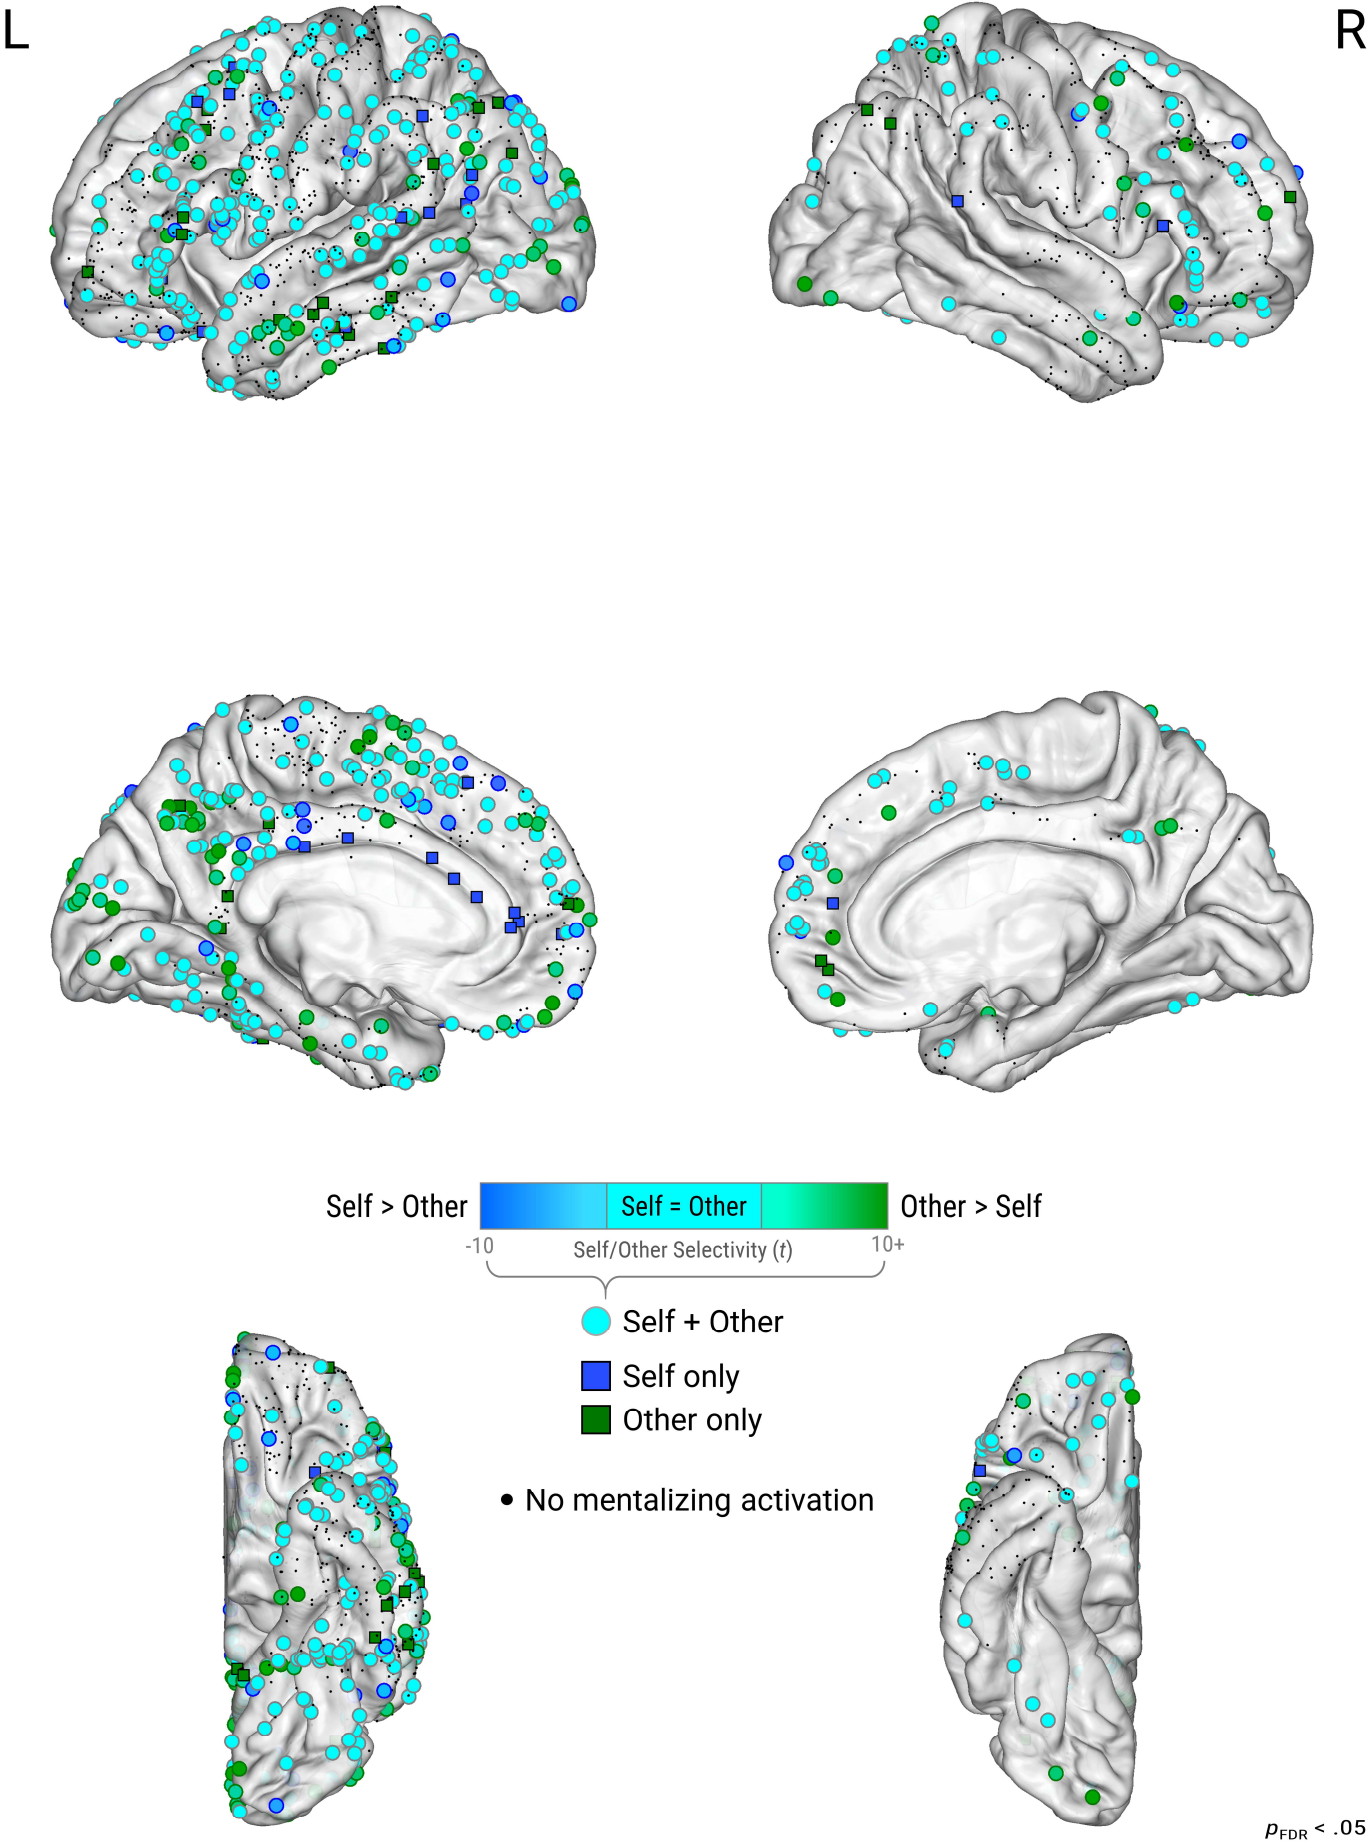



Supplementary Figure S7: expanded lateralized views of Figure 5A. Mean mentalizing HFB onset latencies of mentalizing-active sites using single-trial analysis (see Figure 1E).

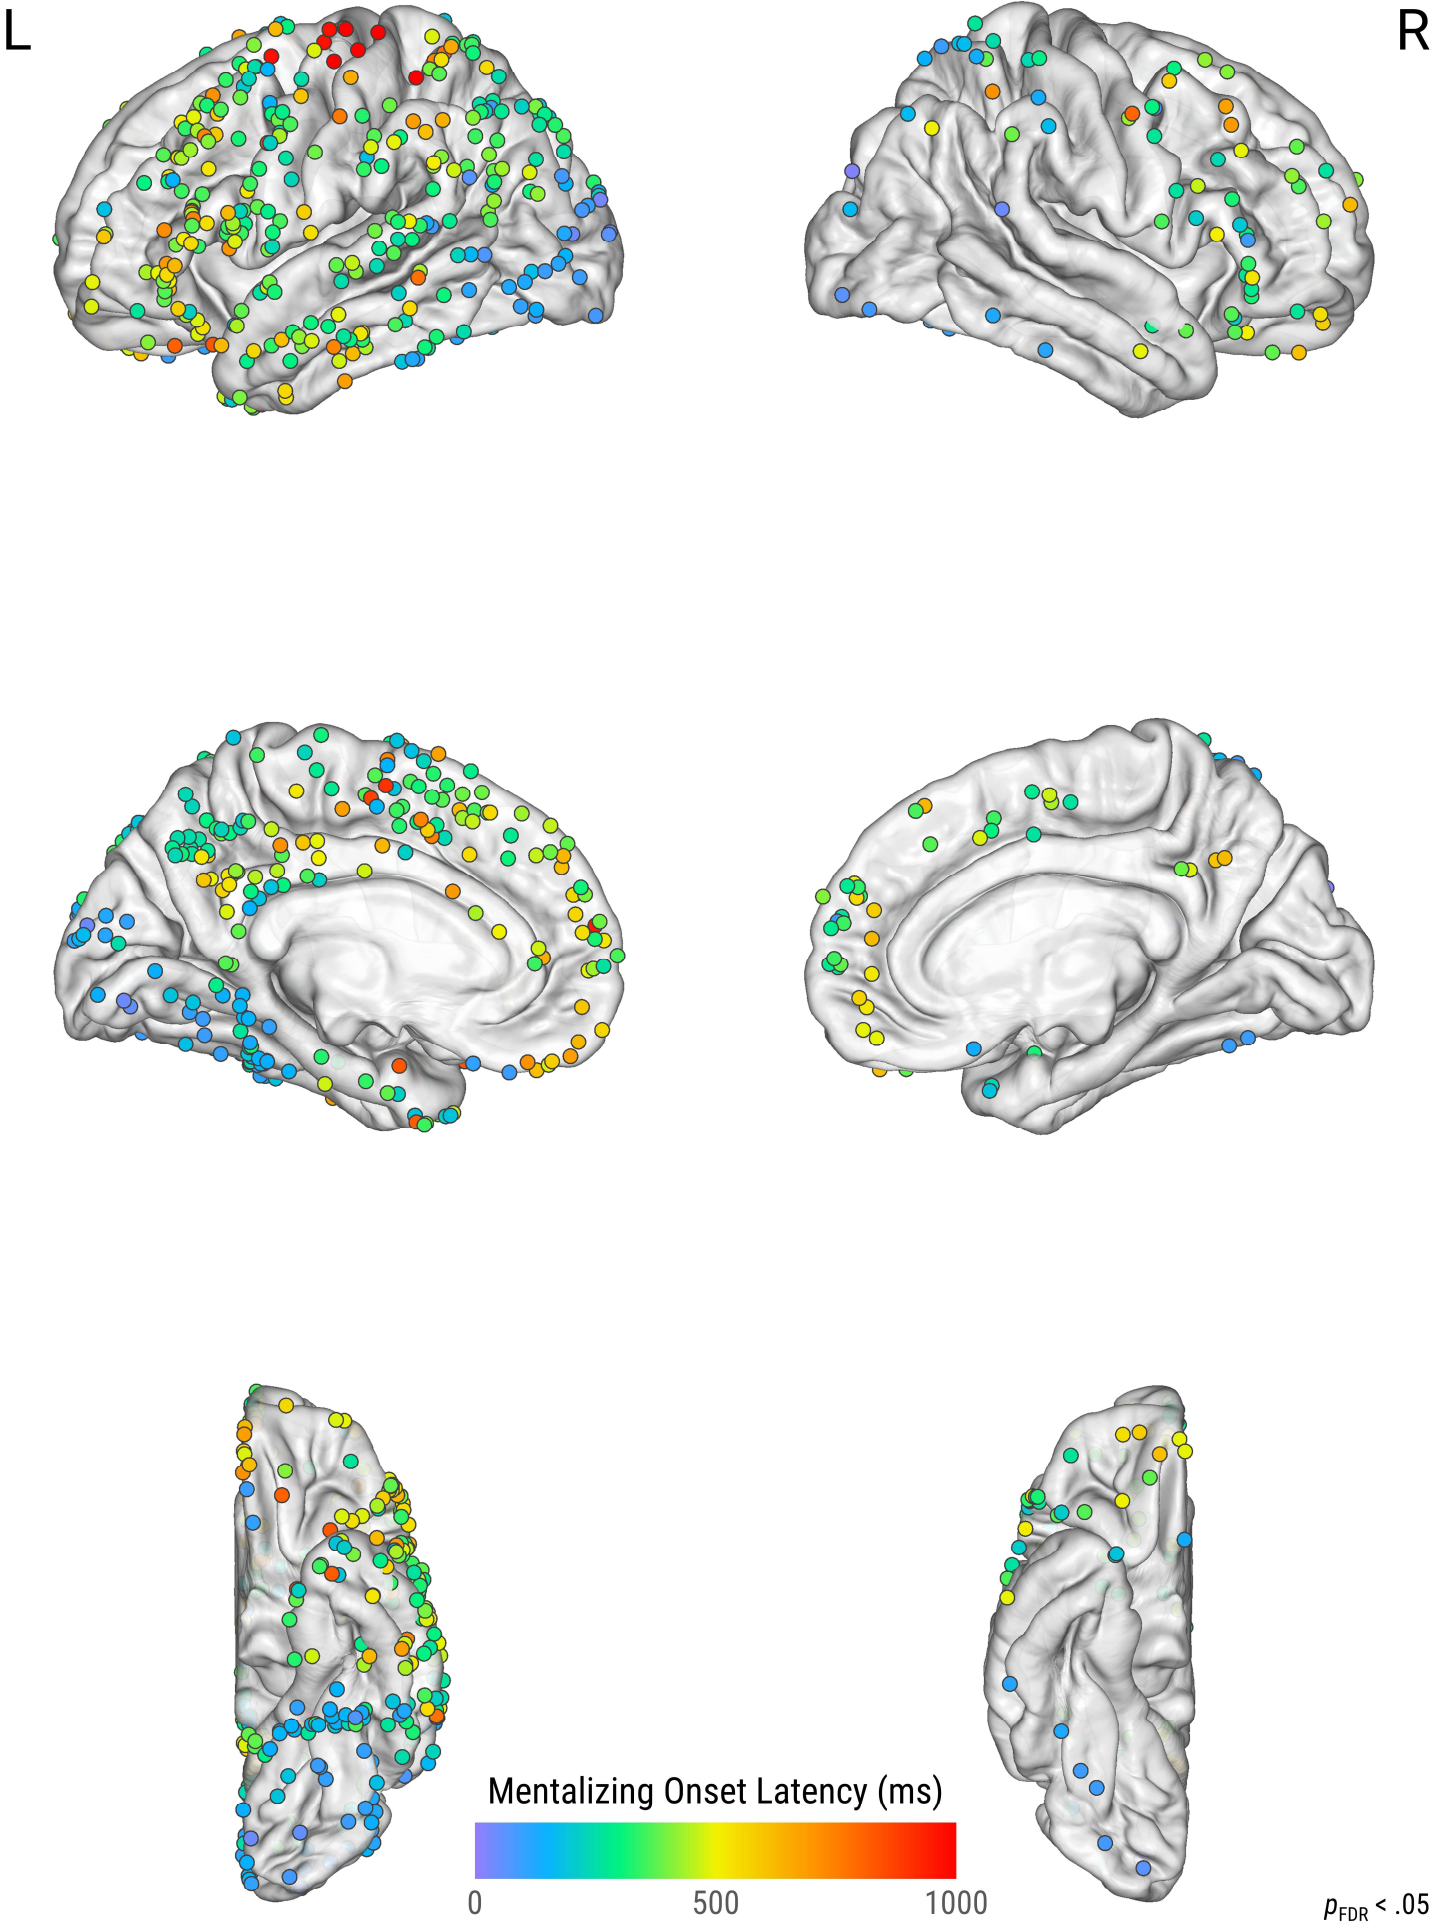

Supplementary Table 1. ROI analysis of activation duration

| <b>Omnibus</b>                  | <b>Duration (ms)</b> |                          |                 |
|---------------------------------|----------------------|--------------------------|-----------------|
|                                 | <i>F</i>             | <i>DF</i> <sub>1/2</sub> | <i>p</i>        |
| ROI                             | 2.005                | 6/25                     | 0.102           |
| Cond (Other-Self)               | 31.29                | 1/14                     | <b>&lt;.001</b> |
| RT <sub>Task</sub>              | 292.6                | 1/16                     | <b>&lt;.001</b> |
| ROI x Cond                      | 1.320                | 6/108                    | 0.255           |
| ROI x RT <sub>Task</sub>        | 4.849                | 6/15                     | <b>0.006</b>    |
| Cond x RT <sub>Task</sub>       | 1.662                | 1/59                     | 0.202           |
| ROI x Cond x RT <sub>Task</sub> | 2.344                | 6/35                     | 0.052           |
| <b>Cond in ROI</b>              | <i>b</i>             | <i>SE</i>                | <i>p</i>        |
| Visual <sub>Other - Self</sub>  | -23                  | 15                       | 0.111           |
| TPJ <sub>Other - Self</sub>     | 21                   | 31                       | 0.487           |
| ATL <sub>Other - Self</sub>     | 48                   | 31                       | 0.119           |
| PMC <sub>Other - Self</sub>     | 101                  | 18                       | <b>&lt;.001</b> |
| amPFC <sub>Other - Self</sub>   | 146                  | 31                       | <b>&lt;.001</b> |
| dmPFC <sub>Other - Self</sub>   | 148                  | 24                       | <b>&lt;.001</b> |
| vmPFC <sub>Other - Self</sub>   | 196                  | 43                       | <b>&lt;.001</b> |
| <b>RT in ROI</b>                | <i>b</i>             | <i>SE</i>                | <i>P</i>        |
| Visual                          | 0.342                | 0.026                    | <b>&lt;.001</b> |
| TPJ                             | 0.295                | 0.043                    | <b>&lt;.001</b> |
| ATL                             | 0.221                | 0.028                    | <b>&lt;.001</b> |
| PMC                             | 0.249                | 0.013                    | <b>&lt;.001</b> |
| amPFC                           | 0.212                | 0.025                    | <b>&lt;.001</b> |
| dmPFC                           | 0.280                | 0.022                    | <b>&lt;.001</b> |
| vmPFC                           | 0.198                | 0.030                    | <b>&lt;.001</b> |

**Supplemental Table 2: Subject demographics and characteristics.**

|     | <b>Age</b> | <b>Sex</b> | <b>IQ</b> | <b>Handedness</b> | <b>ECoG Hemisphere</b> | <b>Epilepsy Duration</b> | <b>Epileptic Foci</b>            |
|-----|------------|------------|-----------|-------------------|------------------------|--------------------------|----------------------------------|
| S1  | 62         | F          | n/a       | R                 | L                      | 49 years                 | Orbitofrontal, Medial Temporal   |
| S2  | 40         | M          | 88        | R                 | L                      | 23 years                 | Lateral Frontal, Medial Temporal |
| S3  | 24         | F          | 101       | R                 | R                      | 4 years                  | Ventral Temporal                 |
| S4  | 36         | F          | n/a       | R                 | L                      | 9 years                  | Primary Motor                    |
| S5  | 22         | F          | n/a       | R                 | L                      | 1 year                   | Medial Frontal                   |
| S6  | 51         | F          | 101       | L                 | L                      | 8 years                  | Medial Temporal                  |
| S7  | 46         | M          | n/a       | L & R             | R                      | 16 years                 | Primary Motor                    |
| S8  | 31         | F          | 71        | R                 | L                      | 18 years                 | Orbitofrontal                    |
| S9  | 52         | F          | 112       | R                 | L                      | 36 years                 | Lateral Parietal                 |
| S10 | 28         | M          | 77        | R                 | L                      | 12 years                 | Anterior Temporal                |
| S11 | 33         | M          | 119       | R                 | R                      | 22 years                 | Frontopolar                      |
| S12 | 23         | F          | 93        | R                 | R                      | 15 years                 | Lateral Frontal                  |
| S13 | 38         | F          | 93        | L & R             | L                      | 13 years                 | Primary Motor                    |
| S14 | 44         | M          | n/a       | R                 | L                      | 9 years                  | Lateral Frontal, Medial Temporal |
| S15 | 22         | M          | 100       | R                 | L                      | 5 years                  | Lateral Temporal                 |
| S16 | 48         | F          | 81        | R                 | L                      | 1 year                   | Lateral Temporal                 |

**Supplemental Table 3: Summary statistics of ROI and HFB metrics.** *N*-values refer to the number of subjects with coverage in an ROI. *L*- and *R*-values refer to number of sites in the left and right hemispheres, respectively. The *n*-values refer to the number of sites with significant ( $p_{FDR} < .05$ ) HFB responses. **Abbreviations:** ms = millisecond;  $\bar{x}$  = sample mean; *SE* = standard error; ROI = region of interest; visual = visual cortex; ATL = anterior temporal lobe; TPJ = temporoparietal junction; PMC = posteromedial cortex; amPFC = anteromedial prefrontal cortex; dmPFC = dorsomedial prefrontal cortex; vmPFC = ventromedial prefrontal cortex

| ROI    | <i>N</i> | <i>L</i> | <i>R</i> | Condition | <i>n</i> | Latency (ms) |           |          |           |          |           | Power ( <i>z</i> ) |           | Duration (ms) |           |
|--------|----------|----------|----------|-----------|----------|--------------|-----------|----------|-----------|----------|-----------|--------------------|-----------|---------------|-----------|
|        |          |          |          |           |          | Onset        |           | Peak     |           | Offset   |           | Peak               |           |               |           |
|        |          |          |          |           |          | <i>M</i>     | <i>SE</i> | <i>M</i> | <i>SE</i> | <i>M</i> | <i>SE</i> | <i>M</i>           | <i>SE</i> | <i>M</i>      | <i>SE</i> |
| Visual | 14       | 95       | 7        | Self      | 70       | 96           | 2         | 736      | 13        | 2032     | 22        | 2.776              | 0.041     | 1143          | 14        |
|        |          |          |          | Other     | 70       | 92           | 2         | 708      | 12        | 2046     | 21        | 3.117              | 0.046     | 1133          | 13        |
|        |          |          |          | Cognitive | 73       | 93           | 2         | 928      | 10        | 2528     | 15        | 1.788              | 0.011     | 1218          | 11        |
| TPJ    | 14       | 76       | 19       | Self      | 28       | 324          | 9         | 1074     | 28        | 1907     | 38        | 1.974              | 0.022     | 909           | 24        |
|        |          |          |          | Other     | 28       | 308          | 9         | 1008     | 26        | 1908     | 38        | 1.991              | 0.021     | 928           | 24        |
|        |          |          |          | Cognitive | 32       | 289          | 9         | 1341     | 32        | 2699     | 43        | 1.004              | 0.021     | 1230          | 25        |
| ATL    | 12       | 74       | 38       | Self      | 24       | 341          | 11        | 1063     | 32        | 1808     | 46        | 1.608              | 0.025     | 758           | 25        |
|        |          |          |          | Other     | 24       | 367          | 12        | 1152     | 34        | 2057     | 45        | 1.709              | 0.027     | 870           | 25        |
|        |          |          |          | Cognitive | 14       | 328          | 29        | 1487     | 41        | 2634     | 48        | 1.476              | 0.024     | 964           | 22        |
| PMC    | 10       | 66       | 9        | Self      | 44       | 345          | 8         | 902      | 14        | 2038     | 29        | 2.026              | 0.025     | 706           | 12        |
|        |          |          |          | Other     | 48       | 360          | 7         | 1020     | 15        | 2266     | 28        | 2.398              | 0.037     | 871           | 14        |
|        |          |          |          | Cognitive | 49       | 299          | 8         | 1651     | 31        | 3129     | 33        | 0.941              | 0.020     | 1653          | 28        |
| amPFC  | 11       | 36       | 13       | Self      | 18       | 476          | 17        | 1260     | 33        | 2147     | 51        | 1.835              | 0.033     | 713           | 20        |
|        |          |          |          | Other     | 15       | 496          | 18        | 1406     | 34        | 2378     | 49        | 1.999              | 0.034     | 970           | 27        |
|        |          |          |          | Cognitive | 18       | 328          | 11        | 2016     | 39        | 3575     | 38        | -0.888             | 0.011     | 1522          | 34        |
| dmPFC  | 10       | 54       | 27       | Self      | 28       | 488          | 12        | 1236     | 23        | 2162     | 36        | 1.875              | 0.019     | 712           | 16        |
|        |          |          |          | Other     | 28       | 528          | 14        | 1516     | 27        | 2427     | 36        | 1.883              | 0.019     | 955           | 19        |
|        |          |          |          | Cognitive | 28       | 347          | 9         | 1881     | 27        | 3311     | 29        | -0.878             | 0.008     | 1406          | 24        |
| vmPFC  | 11       | 33       | 8        | Self      | 10       | 568          | 25        | 1412     | 37        | 2284     | 50        | 1.829              | 0.027     | 798           | 27        |
|        |          |          |          | Other     | 11       | 626          | 22        | 1695     | 37        | 2745     | 46        | 2.169              | 0.031     | 1107          | 34        |
|        |          |          |          | Cognitive | 12       | 365          | 12        | 1762     | 39        | 3103     | 42        | -0.904             | 0.013     | 1269          | 33        |

**Supplemental Table 4:** Lateralized summary statistics for mentalizing-evoked HFB activations (collapsed across self and other). n = number of mentalizing-active sites.

| ROI           | L/R | n  | Latency (ms) |    |      |     |        |     | Power (z-score) |       |
|---------------|-----|----|--------------|----|------|-----|--------|-----|-----------------|-------|
|               |     |    | Onset        |    | Peak |     | Offset |     | Peak            |       |
|               |     |    | M            | SE | M    | SE  | M      | SE  | M               | SE    |
| <b>Visual</b> | L   | 65 | 96           | 2  | 718  | 9   | 2170   | 16  | 2.969           | 0.033 |
|               | R   | 5  | 86           | 5  | 781  | 40  | 1699   | 53  | 2.635           | 0.066 |
| <b>TPJ</b>    | L   | 31 | 323          | 6  | 1033 | 19  | 2005   | 26  | 2.046           | 0.016 |
|               | R   | 3  | 234          | 30 | 1337 | 121 | 2405   | 155 | 1.778           | 0.050 |
| <b>ATL</b>    | L   | 22 | 368          | 9  | 1137 | 25  | 2248   | 35  | 1.810           | 0.023 |
|               | R   | 2  | 288          | 24 | 759  | 59  | 1301   | 78  | 1.578           | 0.047 |
| <b>PMC</b>    | L   | 44 | 362          | 6  | 941  | 11  | 2139   | 21  | 1.959           | 0.014 |
|               | R   | 4  | 423          | 23 | 1243 | 39  | 2395   | 70  | 1.608           | 0.027 |
| <b>amPFC</b>  | L   | 11 | 557          | 20 | 1682 | 39  | 2991   | 50  | 1.808           | 0.019 |
|               | R   | 9  | 425          | 15 | 1019 | 22  | 1638   | 38  | 1.970           | 0.025 |
| <b>dmPFC</b>  | L   | 16 | 496          | 13 | 1489 | 27  | 2595   | 36  | 2.033           | 0.020 |
|               | R   | 12 | 491          | 13 | 1267 | 23  | 1984   | 35  | 1.721           | 0.016 |
| <b>vmPFC</b>  | L   | 7  | 657          | 24 | 1745 | 35  | 2652   | 41  | 1.921           | 0.026 |
|               | R   | 4  | 517          | 22 | 1347 | 38  | 2396   | 57  | 2.133           | 0.035 |
